# Supplementary material for: The MLKL kinase-like domain dimerization is an indispensable step of mammalian MLKL activation in necroptosis signaling
Source: PubMed Central journal article supplement (PMC8219780; doi:10.1038/s41419-021-03859-6), 2021-06-22

Figure S1

A

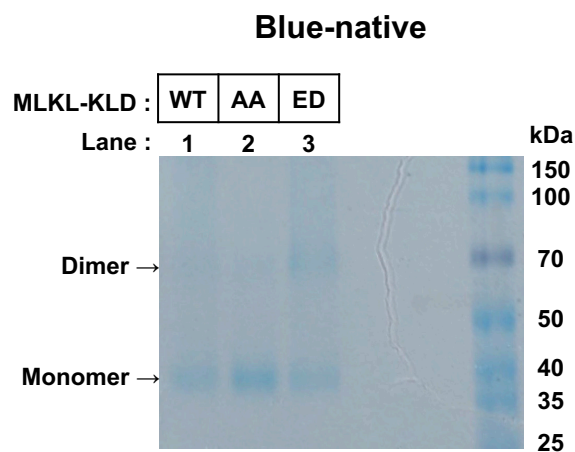

B

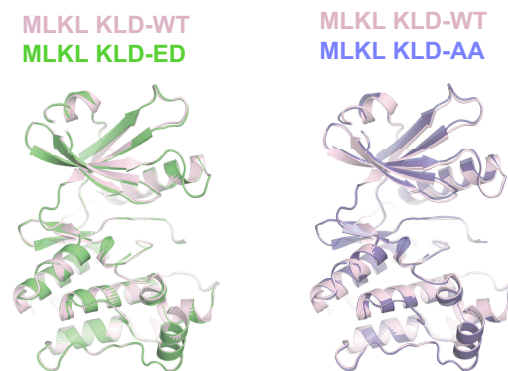

C

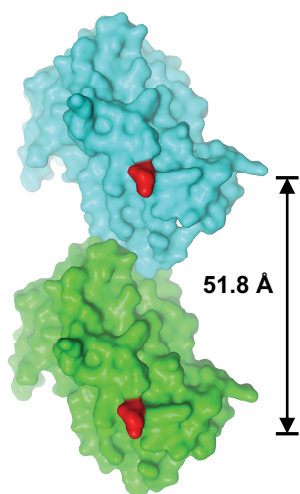

D

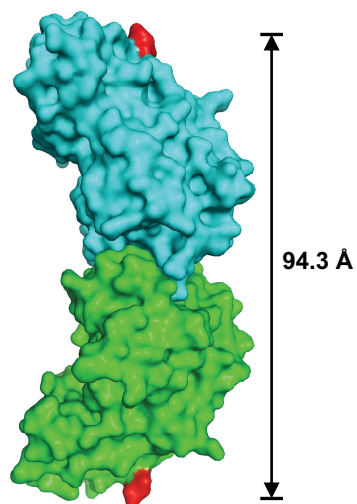

E

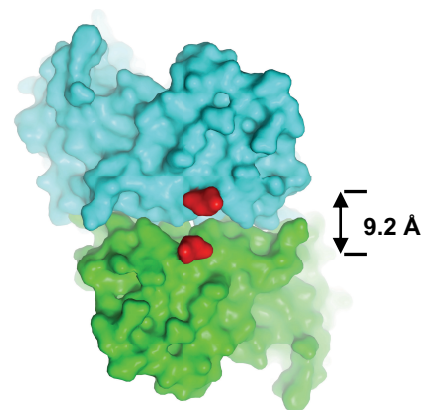

Figure S2

A

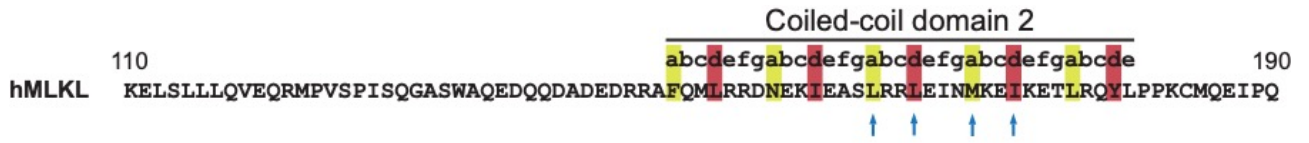

B

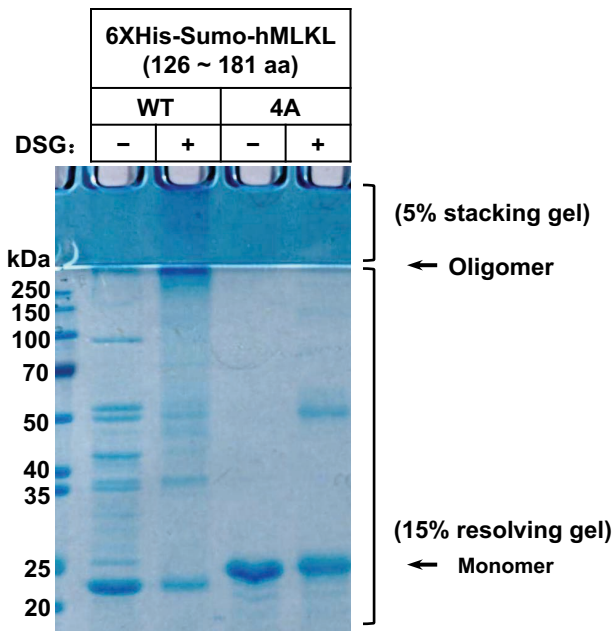

C

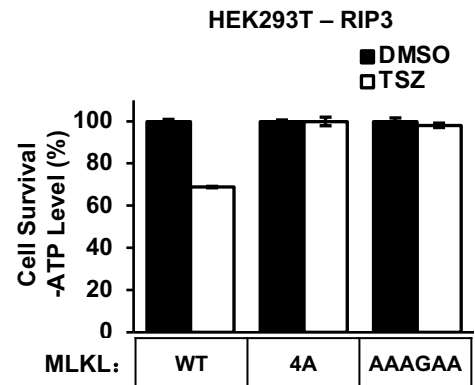

Figure S3

**A**

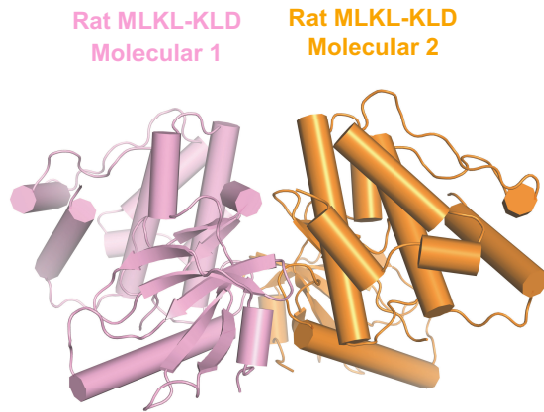

**B**

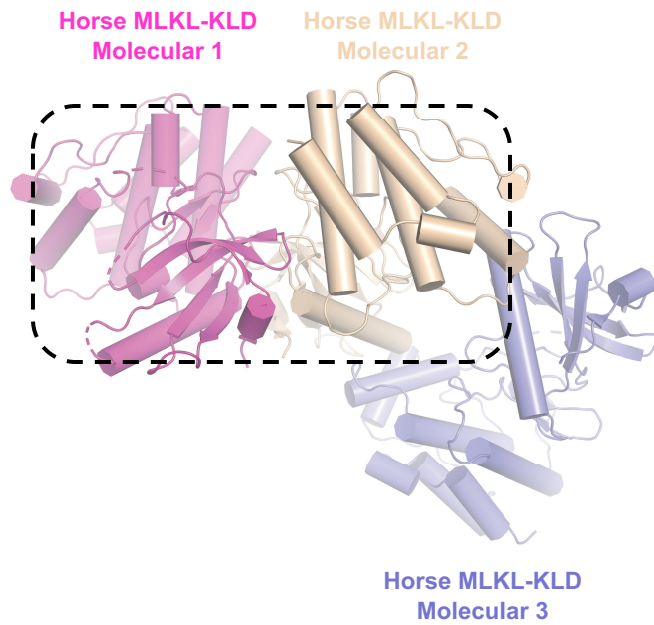

Supplement: 41419_2021_3859_MOESM1_ESM.pdf [file 41419_2021_3859_MOESM1_ESM.pdf]
